# Supplementary material for: One-pot hydrothermal synthesis of peony-like Ag/Ag0.68V2O5 hybrid as high-performance anode and cathode materials for rechargeable lithium batteries
Source: Royal Society of Chemistry journal article supplement (doi:10.1039/c4nr00250d), 2014-01-01
Supplement: c4nr00250d1.pdf [file c4nr00250d1.pdf]

## Supplementary Information

### One-pot Hydrothermal Synthesis of Peony-like Ag/Ag<sub>0.68</sub>V<sub>2</sub>O<sub>5</sub> Hybrid as High-Performance Anode and Cathode Materials for Rechargeable Lithium Batteries

Denghu Wei,<sup>a</sup> Xiaona Li,<sup>a</sup> Yongchun Zhu,<sup>\*a</sup> Jianwen Liang,<sup>a</sup> Kailong Zhang,<sup>a</sup> and Yitai Qian<sup>\*a,b</sup>

<sup>a</sup> Hefei National Laboratory for Physical Science at Microscale and Department of Chemistry, University of Science and Technology of China, Hefei, 230026, P.R. China. Tel: +86-551-63601589; E-mail: ychzhu@ustc.edu.cn

<sup>b</sup> School of Chemistry and Chemical Engineering, Shandong University, Jinan, 250100, PR China. Tel: +86-551-63607234; E-mail: ytqian@ustc.edu.cn

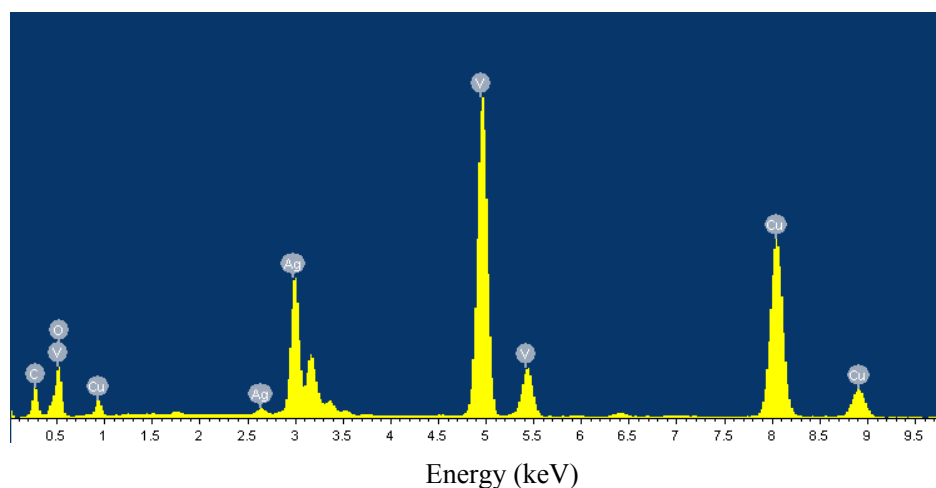

**Figure S1.** EDS of the Ag/Ag<sub>0.68</sub>V<sub>2</sub>O<sub>5</sub> hybrid.

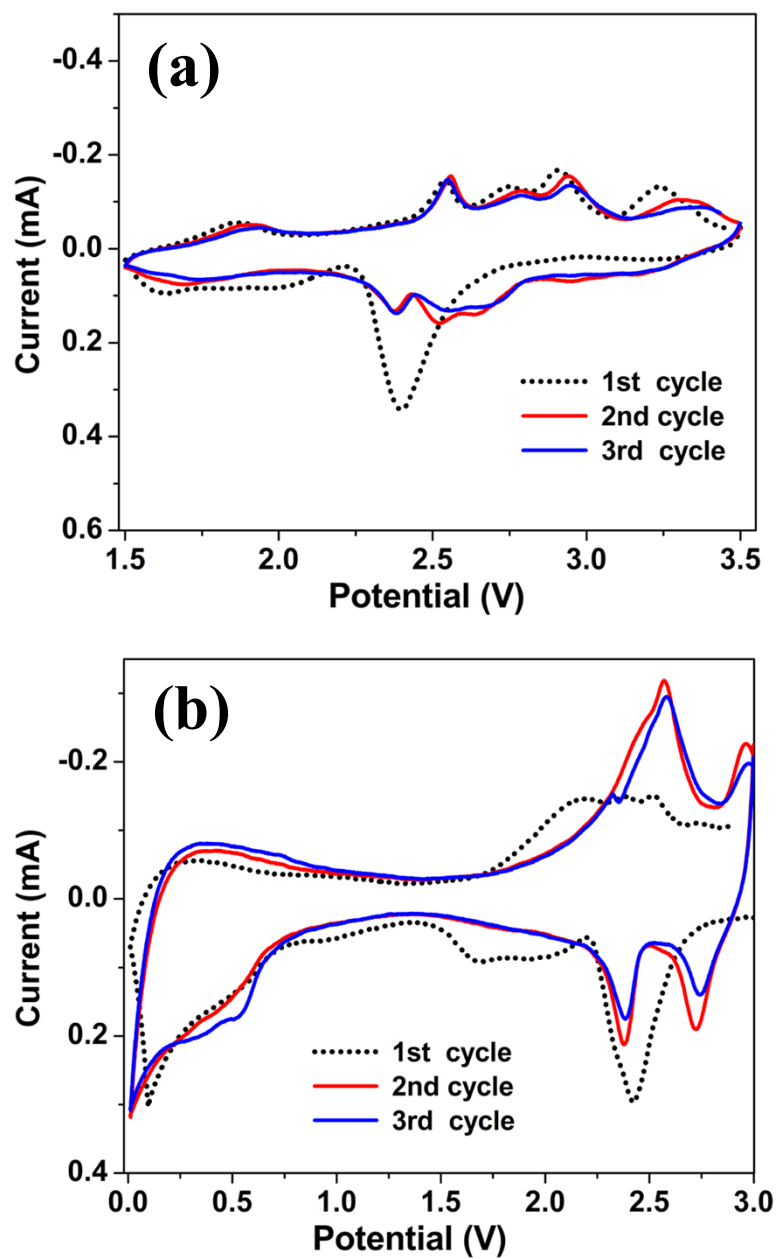

**Figure S2** The first three consecutive CVs of the composite at a scan rate of  $0.1 \text{ mV s}^{-1}$  between 1.5 and 3.5 V (a); 0.01~3.00 V (b).

| Method                                  | Composition                                                        | Current density (mA/g) |       | Capacity (mAh/g) |         | Capacity retention (cycle number) |            |
|-----------------------------------------|--------------------------------------------------------------------|------------------------|-------|------------------|---------|-----------------------------------|------------|
|                                         |                                                                    | Cathode                | Anode | Cathode          | Anode   | Cathode                           | Anode      |
| Based on $\beta$ -AgVO <sub>3</sub> [9] | $\beta$ -AgVO <sub>3</sub> /PANI                                   | 30                     |       | 211-131          |         | 62%(20)                           |            |
| Substrate-assisted [10]                 | $\beta$ -AgVO <sub>3</sub> cluster                                 | 100                    |       | 220-100          |         | 45%(50)                           |            |
| Hydrothermal [S1]                       | $\beta$ -Ag <sub>0.33</sub> V <sub>2</sub> O <sub>5</sub> nanowire | 20                     |       | 240-160          |         | 67% (8)                           |            |
| Solid approach [17]                     | Ag/AgVO <sub>3</sub> nanorod                                       | 50                     |       | 242-111          |         | 46%(30)                           |            |
| This work                               | Ag/Ag <sub>0.68</sub> V <sub>2</sub> O <sub>5</sub> flower         | 100                    | 400   | 321-150          | 499-524 | 47%(65)                           | 105%(1000) |

**Table S1.** Electrochemical properties of SVOs prepared by different methods.

[S1] Hu, W.; Zhang, X.; Cheng, Y.; Wu, C.; Cao, F.; Wang, L., *ChemSusChem* **2011**, *4*, 1091.

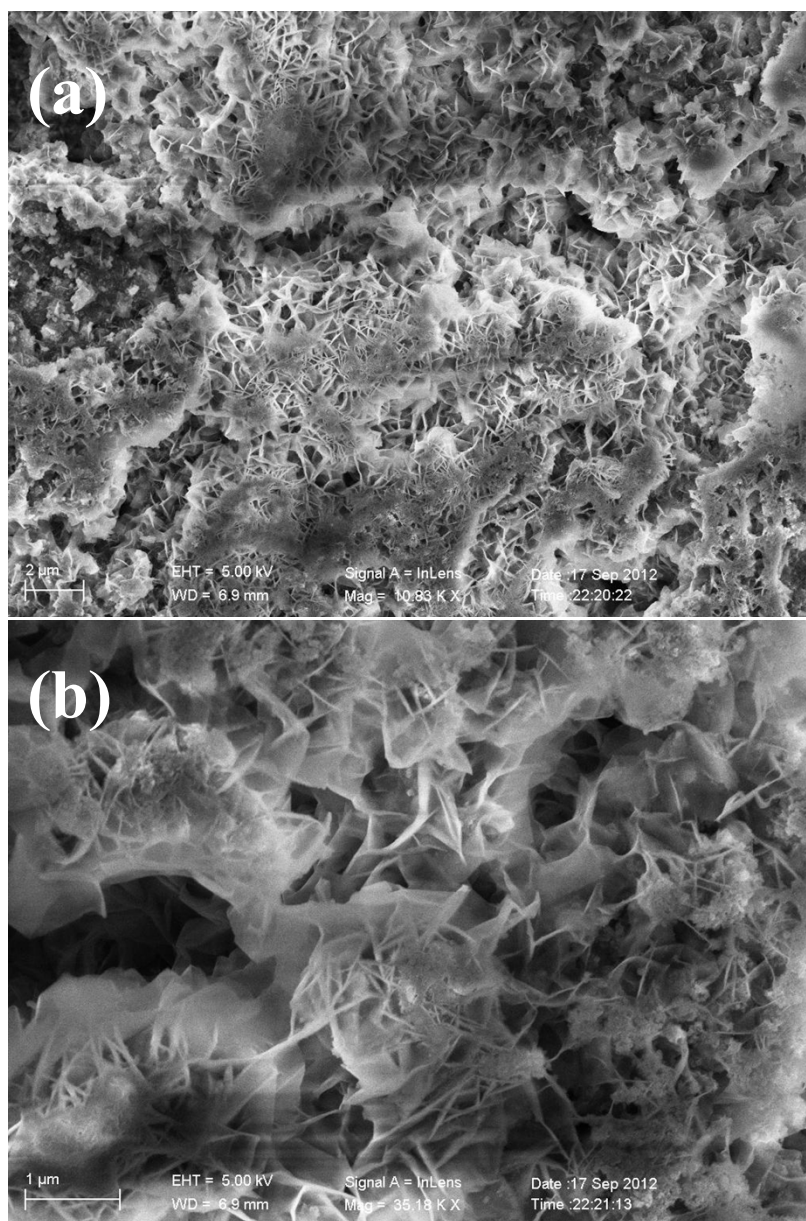

**Figure S3** SEM images of the Ag/Ag<sub>0.68</sub>V<sub>2</sub>O<sub>5</sub> hybrid after a few cycles as a cathode material.

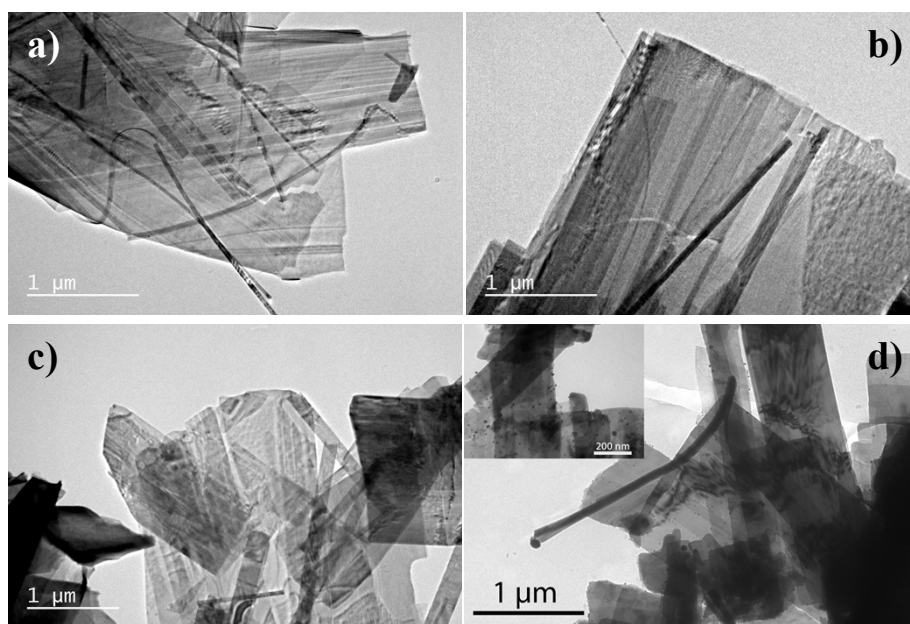

**Figure S4** TEM images of the Ag/Ag<sub>0.68</sub>V<sub>2</sub>O<sub>5</sub> hybrid with different reaction time a) 1 h; b) 6 h; c) 12 h; and d) 24 h.

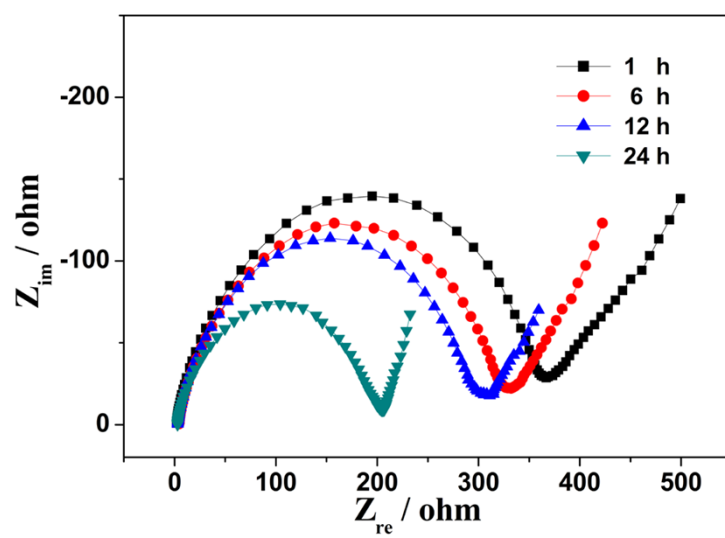

**Figure S5** Electrochemical impedance spectrum of the samples with different reaction time.
